# Supplementary material
Source: PubMed Central journal article supplement (PMC6753621)
Supplement: bloodBLD2019000049-suppl1.pdf [file bloodBLD2019000049-suppl1.pdf]

## SUPPLEMENTAL MATERIAL

### Supplemental Figures and Legends

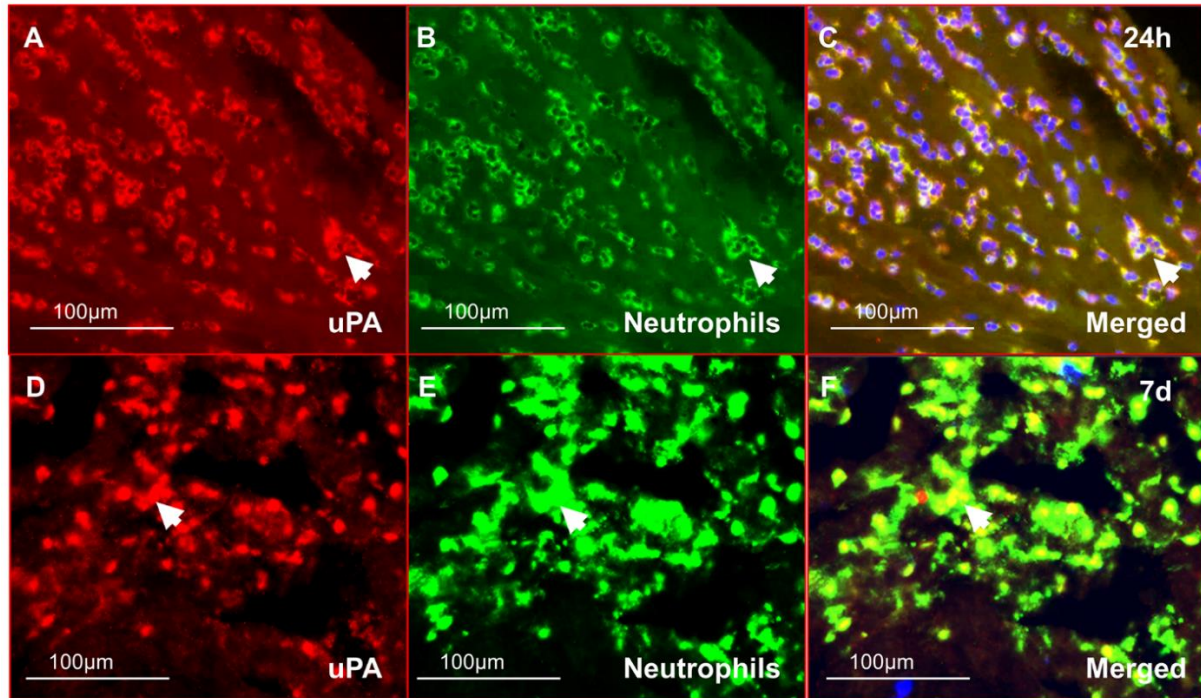

**Supplemental figure 1. Neutrophil-associated expression of uPA in 24 h and 7 days IVC thrombi.** Cryosections (8 µm) of IVC thrombi (scale bar = 100 µm) showing immunostaining for uPA and neutrophils in representative 24 h (A-C) and 7 day thrombi (D-F). Immunostaining for uPA (A, D) in red (e.g., white arrow) was detected by rabbit-anti mouse uPA and AF555 donkey anti-rabbit antibodies. Immunostaining for neutrophils (B, E) in green (e.g., white arrow) was detected by rat anti-mouse Ly-6G and AF488 donkey anti-rat antibodies. The merged images (C, F) show co-localization of uPA with neutrophils (yellow color, white arrow); nuclei are stained blue with DAPI. Representative images of 24 h and 7 days old IVC thrombi respectively as labelled, N=4 each. Images were captured on Zeiss Axio image M2 upright fluorescence microscope

at 40X magnification by an Axiocam 506 digital monochrome camera using Zeiss Zen  
lite software.

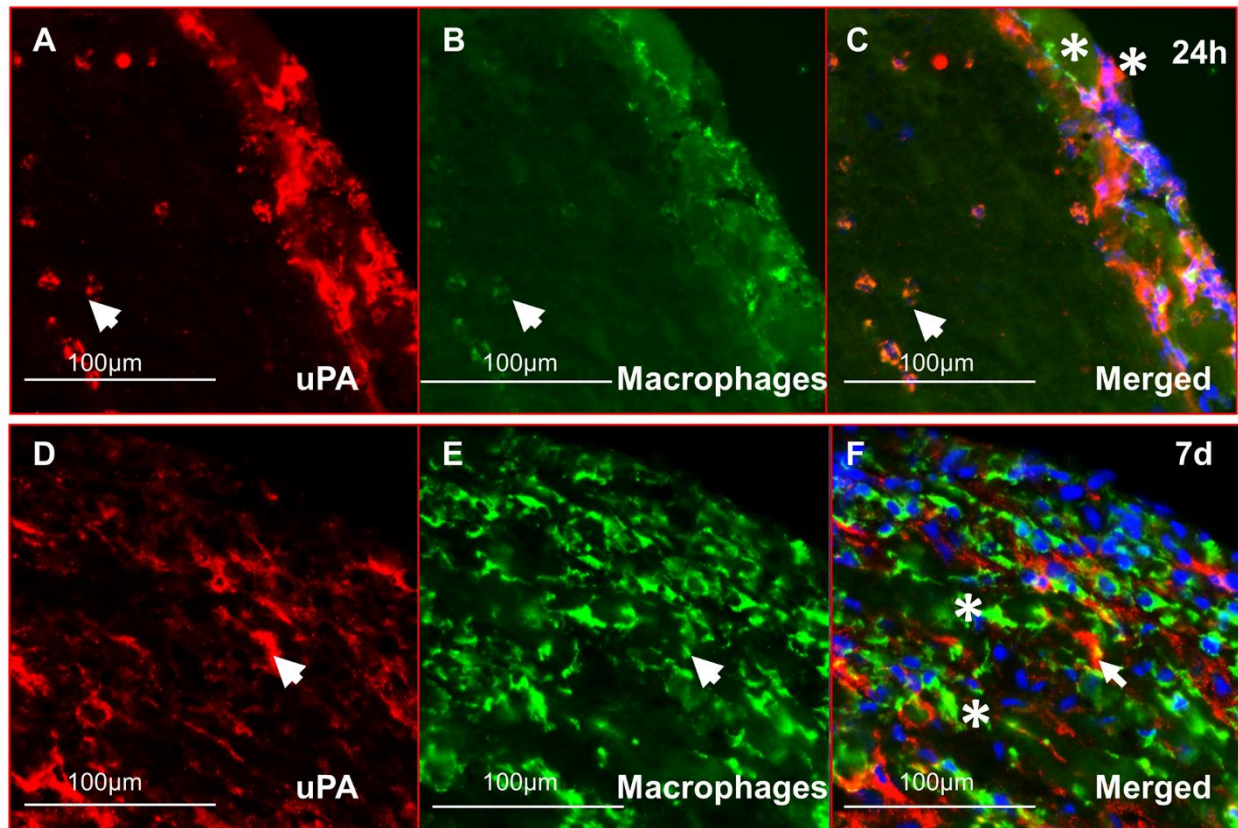

**Supplemental figure 2. Expression of uPA by monocytes or macrophages in 24 h and 7 days IVC thrombi.** Cryosections (8 µm) of IVC thrombi (scale bar = 100 µm) showing uPA in red (e.g., white arrow A, D) detected by rabbit-anti mouse uPA and AF555 donkey anti-rabbit antibodies. Monocytes or macrophages in green (e.g., white arrow B, E), detected by rat anti-mouse CD68 and AF488 donkey anti-rat antibodies. The merged images (C, F) show partial colocalization of uPA with monocytes/macrophages (yellow/orange color, white arrow); DAPI staining of nuclei is show in blue. Asterisks show areas where macrophages/monocytes did not colocalize with uPA. Panels **A-C** and **D-F** show representative images of 24 h and 7 days old IVC thrombi respectively, N=4 each. Images were captured on Zeiss Axio image M2 upright fluorescence microscope at 40X magnification by an Axiocam 506 digital monochrome camera using Zeiss Zen lite software.

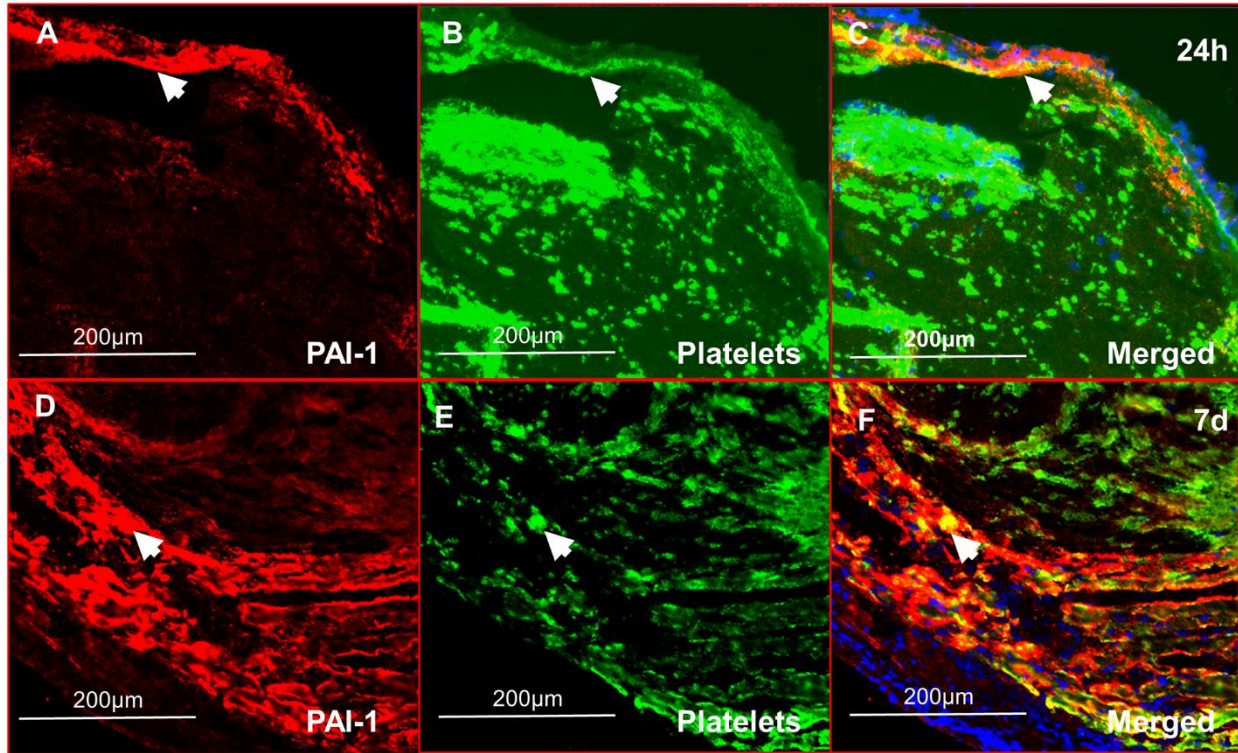

**Supplemental figure 3. Detection of platelets and PAI-1 in 24 h and 7 days IVC thrombi.** Cryosections (8 µm) of IVC thrombi (scale bar = 100 µm) showing PAI-1 (red, white arrow, A, D) detected by rabbit-anti mouse PAI-1 and AF555 donkey anti-rabbit antibodies. Platelets (green, white arrow, B, E) were detected by rat anti-mouse CD41 and AF488 donkey anti-rat antibodies. The merged images (C, F) show partial co-localization of PAI-1 with platelets (yellow/orange color, white arrow); nuclei stained by DAPI are blue. Panels **A-C** and **D-F** show representative images of 24 h and 7 days old IVC thrombi respectively as labelled, N=4 each. Images were captured on Zeiss Axio image M2 upright fluorescence microscope at 40X magnification by an Axiocam 506 digital monochrome camera using Zeiss Zen lite software.

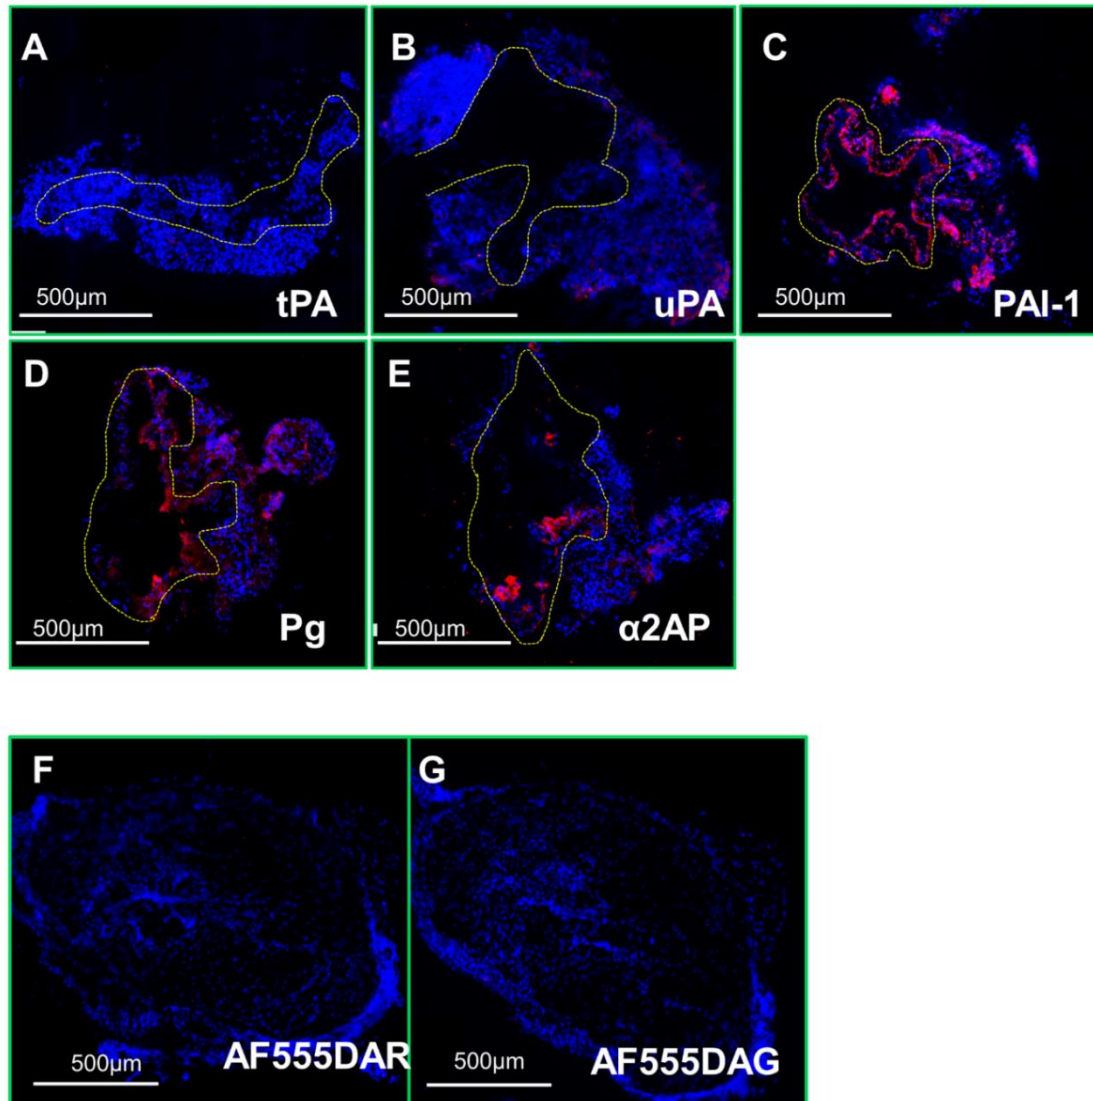

**Supplemental figure 4. Detection of fibrinolytic system components in sham controls.** Panels A-F show the expression (red color) of **(A)** tPA, **(B)** uPA, **(C)** PAI-1, **(D)** plasminogen (Pg) **(E)**  $\alpha$ 2AP in sham controls. Panel **(F)** and **(G)** show negative controls for secondary antibodies, Alexa Fluor 555® conjugated donkey anti-rabbit and donkey anti-goat. The primary antibody was not added as a control. One IVC section was always used as a negative control on each slide for comparison. Images (original magnification  $\times 4$ ) of whole IVC sections were captured (500 $\mu$ m). The yellow dotted lines indicate the outline of the vascular lumen.

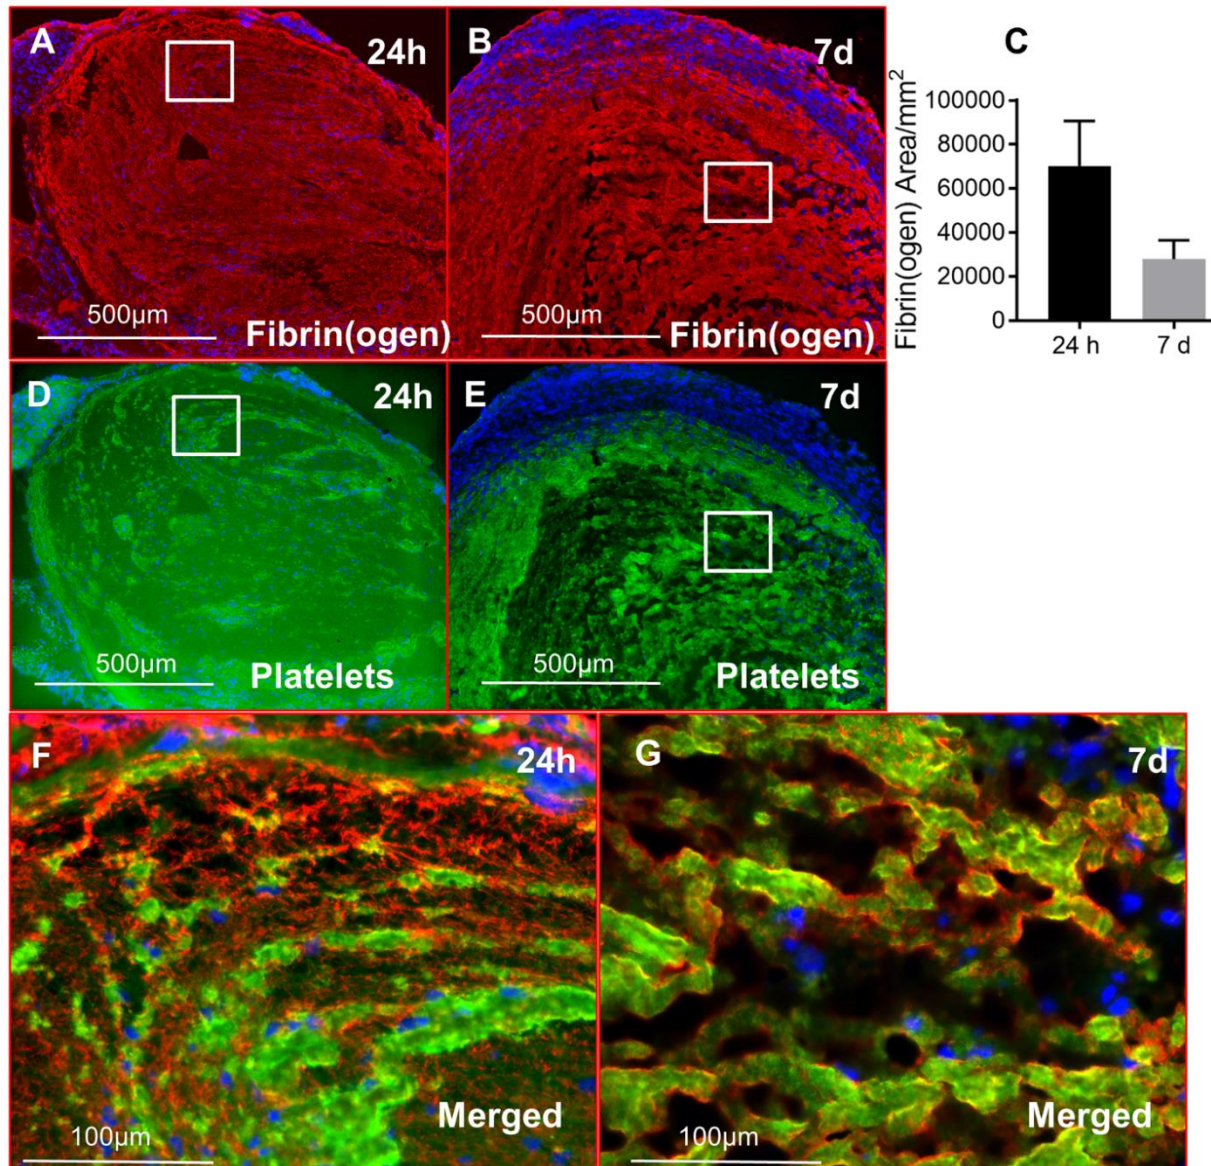

**Supplemental figure 5. Fibrin(ogen) and platelet distribution in 24 h and 7 days IVC thrombi.** Cryosections (8 µm) of IVC thrombi (scale bar = 100 µm) showing fibrin(ogen) (red, detected by rabbit-anti mouse fibrin(ogen) and AF555 donkey anti-rabbit antibody (A, B). Detection of platelets (green, D, E) by rat anti-mouse CD41 and AF488 donkey anti-rat antibodies. The merged images (F, G) show distribution of fibrin(ogen) and platelets in the thrombi. Panel **A-B** show fibrin(ogen) staining in 24 h and 7 days old IVC thrombi. Panel **C** shows fibrinogen quantification (arbitrary units,

area/mm<sup>2</sup> of the thrombus section), N=4,  $P < .105$  (non-significant). The quantification was done using Image Pro Plus as described in methods section. Panel **D-E** show representative images of 24 h and 7 days old IVC thrombi respectively for platelets staining as labeled, N=4 each. Panel **F** and **G** show merged magnified images of areas marked by white box in figure A-B and D-E. Images were captured on Zeiss Axio image M2 upright fluorescence microscope at 40X magnification by an Axiocam 506 digital monochrome camera using Zeiss Zen lite software.

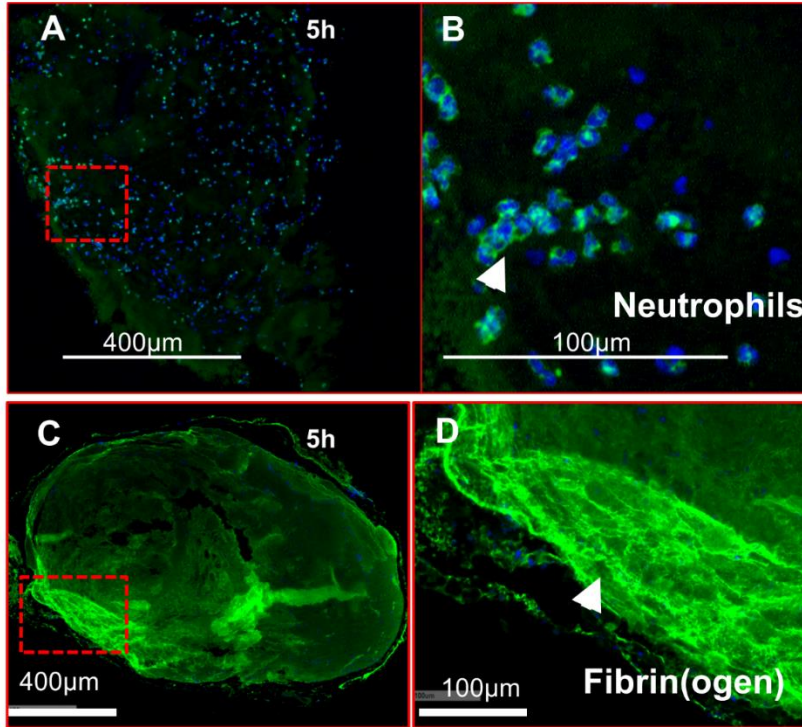

**Supplemental figure 6. Presence of neutrophils and fibrin(ogen) in 5 h IVC**

**thrombi.** Formalin-fixed, paraffin embedded sections (5µm) were immunostained with rat anti-mouse Ly6B.2 antibody followed by AF488 donkey anti-rat antibody (green color). DAPI stained nuclei are blue in color. **(A)** A 4X image of 5h IVC thrombi and **(B)** magnified image (original magnification  $\times 20$ ) of selected area (red box) in (A). The neutrophils are indicated by cell shaped staining (white arrow) in 5 h thrombi. Panel **C-D** show fibrin(ogen) staining, **(C)** 4X image of 5h IVC thrombi and **(D)** Magnified image (original magnification  $\times 20$ ) of selected area (red box) in (C).



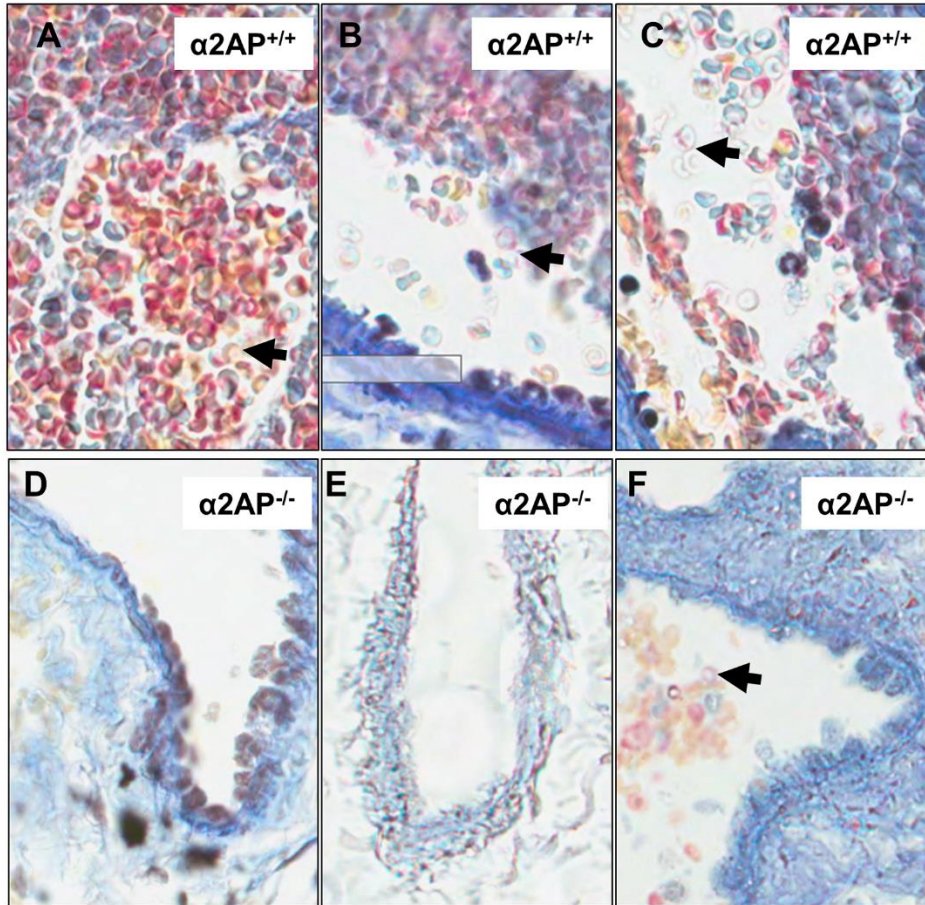

**Supplemental figure 7. Presence of red blood cells (RBCs) in IVC of  $\alpha 2AP^{+/+}$  and  $\alpha 2AP^{-/-}$  mice after 5 h IVC ligation.** Panel A-C show representative images of Martius scarlet blue stained sections (at 40X magnification) of IVC thrombi of three  $\alpha 2AP^{+/+}$  mice after 5 h of IVC ligation as labeled. Panel D-F show representative images (at 40X magnification) of IVC of three  $\alpha 2AP^{-/-}$  mice after 5 h IVC ligation. The black arrows indicate the presence of RBC. There were few (panel F) or no RBCs (panel D-E) were observed.

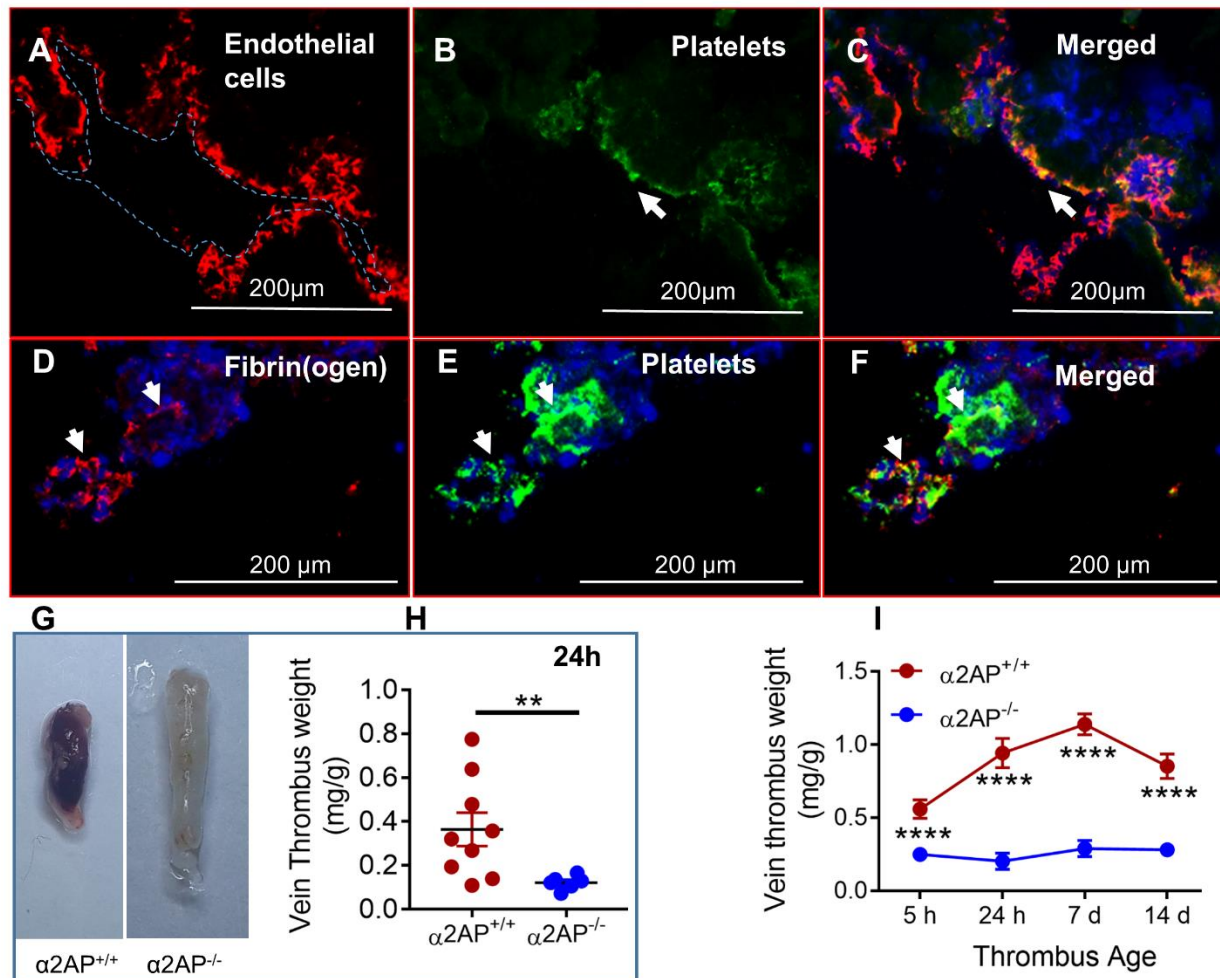

**Supplemental figure 8. Panel (A-C) Platelet deposition on the vascular endothelium in  $\alpha 2AP^{-/-}$  mice after 24 h IVC ligation.** Cryosections (8  $\mu$ m) of IVC thrombi (Scale bar = 200  $\mu$ m) showing **(A)** endothelial cells (red, detected by rabbit-anti mouse CD31 and AF555 donkey anti-rabbit) and **(B)** platelets (green, white arrow, detected by rat anti-mouse CD41 and AF488 donkey anti-rat). The blue dotted line in panel A shows the inner vascular boundary of IVC lined by endothelium. The merged image **(C)** showing the presence of platelets on the vascular endothelium (white arrow), N=4 each. **(D-F)** Immunofluorescence images of a microscopic vein thrombus in  $\alpha 2AP^{-/-}$  mice after 24 h IVC ligation. Panel **D**: fibrin(ogen) (red color, white arrows). Panel **E**:

platelets (green color, white arrows). Panel **F**: merged image showing colocalization of fibrin(ogen) and platelet immunostaining. **Panels G-H** show thrombus formation in  $\alpha 2AP^{+/+}$  vs  $\alpha 2AP^{-/-}$  mice in IVC stenosis model at 24 h. Panel **(G)** shows the representative thrombus formation in  $\alpha 2AP^{+/+}$  mice and empty IVC due to lack of thrombus in  $\alpha 2AP^{-/-}$  mice as labelled. Panel **(H)** The bar graph s represents vein thrombus weight in mg/g of body weight  $**P < .01$  (Mann-Whitney test), N= 15. **(I)** The graph represents vein thrombus weight in mg/g of body weight (mean  $\pm$  SEM) versus thrombus age at different time points of study post IVC ligation in  $\alpha 2AP^{+/+}$  vs  $\alpha 2AP^{-/-}$  mice, Student's t-test at each point. The animal number is as per data from the main figures.  $****P < .0001$ .

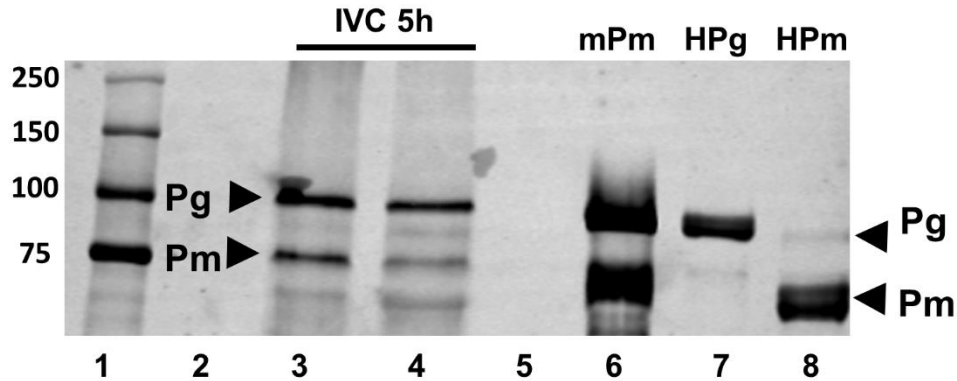

**Supplemental figure 9. Plasmin generation in IVC thrombi after 5 h of IVC ligation in  $\alpha 2AP^{+/+}$  mice.** Thrombus lysates (100  $\mu$ g) were electrophoresed on 10% reducing SDS-PAGE gels along with purified plasminogen and plasmin preparations, and western blotting was done as described in Methods. Each lane is marked: Lane 1- molecular weight marker; lane 2-empty; lane 3,4- thrombus lysates after 5 h of IVC ligation; lane 5- empty; lane 6-mouse plasmin (mPm) (prepared by partial activation of mouse plasminogen with mouse tPA); lane 7- human plasminogen (HPg), lane 8-human plasmin (HPm). The black arrows show plasminogen and the heavy chain of plasmin as detected by rabbit anti-mouse plasminogen antibody followed by goat anti-rabbit 680 IRDye LI-COR secondary antibody (LI-COR biosciences, NE). The blots were scanned by LI-COR Odyssey infrared imaging system.
